# Supplementary material for: A study of superstructure Hf6Ta2O17 ceramics for electrochemical energy storage applications
Source: Royal Society of Chemistry journal article supplement (doi:10.1039/d2se01497a), 2022-12-05
Supplement: d2se01497a1.pdf [file d2se01497a1.pdf]

## Supporting information

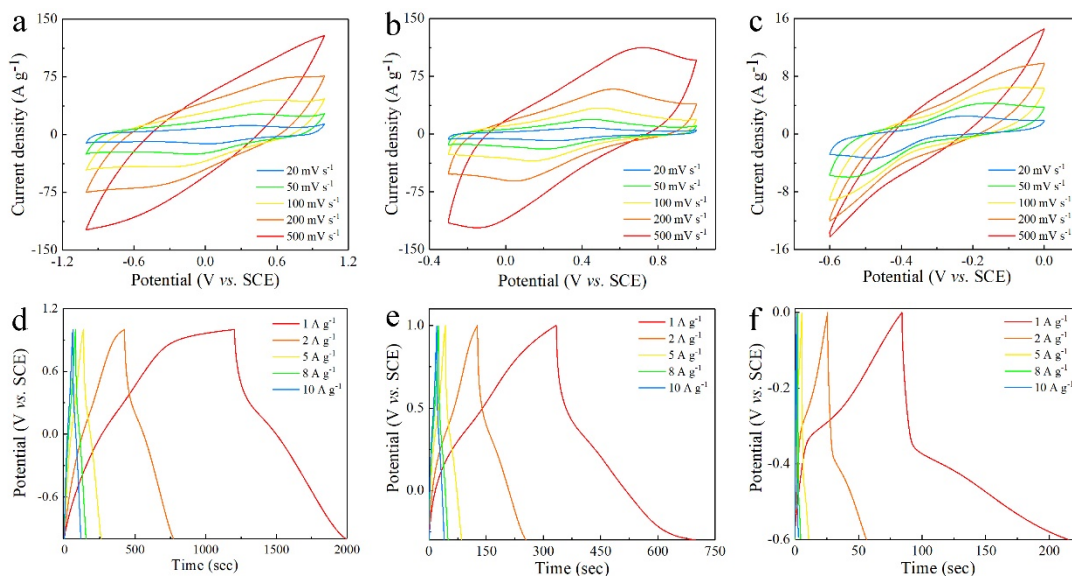

**figure S1.** the CV curves of HTO in 1 M Na<sub>2</sub>SO<sub>4</sub> (a), 1 M H<sub>2</sub>SO<sub>4</sub> (b) and 1 M KOH (c) at different scan rates. GCD curves of HTO in 1 M Na<sub>2</sub>SO<sub>4</sub> (d), 1 M H<sub>2</sub>SO<sub>4</sub> (e) and 1 M KOH (f) at different current density.

**Table S1.** The detailed Electrochemical properties of HTO in Na<sub>2</sub>SO<sub>4</sub>, H<sub>2</sub>SO<sub>4</sub> and KOH

|                                           | KOH   | H <sub>2</sub> SO <sub>4</sub> | Na <sub>2</sub> SO <sub>4</sub> |
|-------------------------------------------|-------|--------------------------------|---------------------------------|
| potential window (V)                      | 0.6   | 1.3                            | 2                               |
| specific capacitance (F g <sup>-1</sup> ) | 174.7 | 280.8                          | 394.6                           |
| rate capability (%)                       | 12.2  | 53.1                           | 72.6                            |
| R <sub>s</sub> (Ω)                        | 6.146 | 1.881                          | 2.719                           |
| R <sub>ct</sub> (Ω)                       | 6.451 | 4.916                          | 1.574                           |

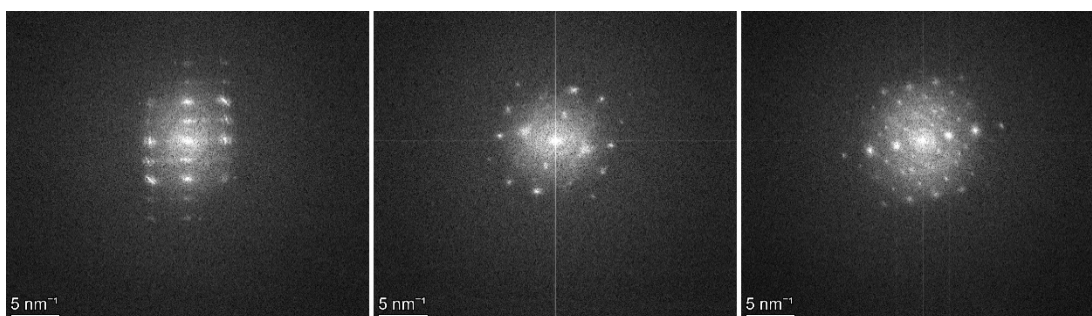

**figure S2.** The electron diffraction patterns of HTO-air, HTO-Ar and HTO-Ar/C

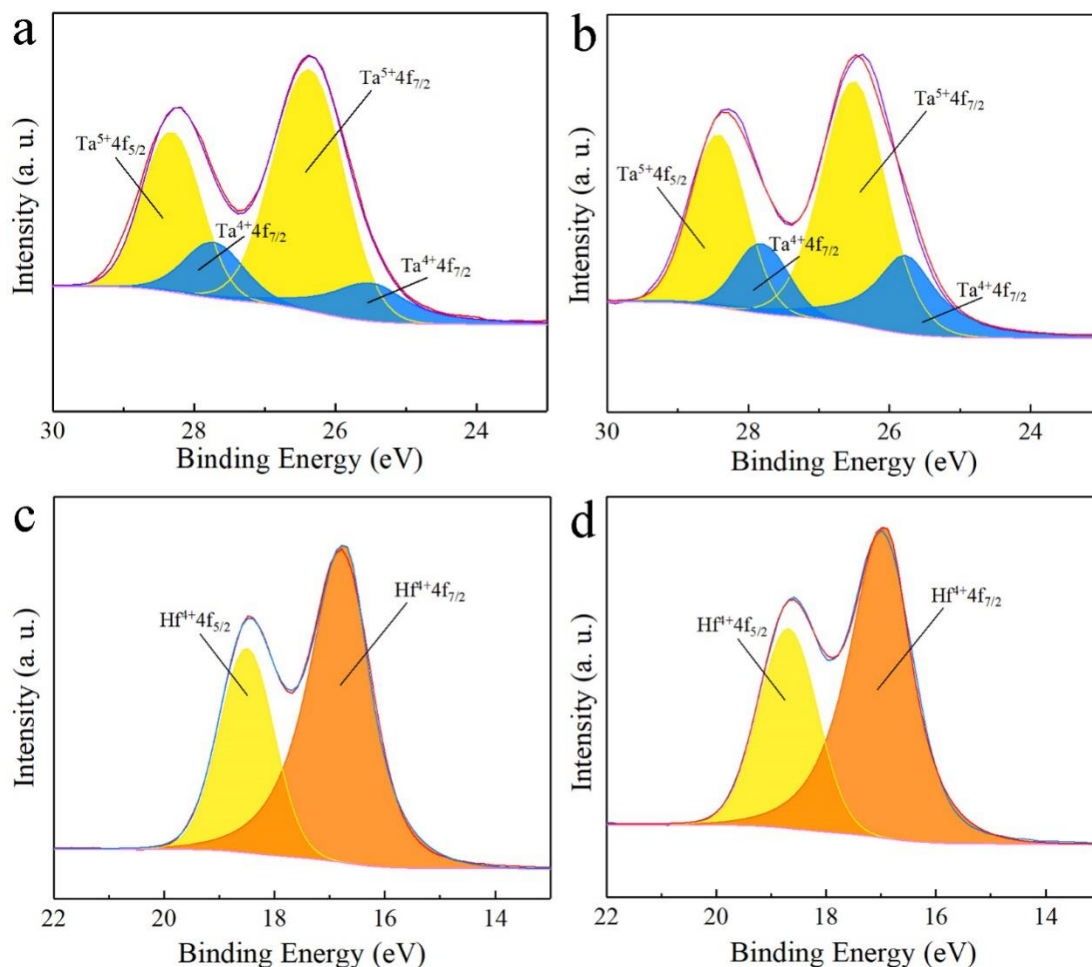

**Figure S3** Ta and Hf XPS spectra of the HTO-Ar (a, b) and HTO-Ar/C (c, d).

## Capacitance Contribution Calculation Methods

### Trasatti Method

The Trasatti method was used to differentiate the capacitance contribution from pseudocapacitance ( $C_p$ ) and electrical double layer capacitance ( $C_{dl}$ ) reactions. CV measurements of COFs were first obtained with the scan rates ranging from 1 to 1000  $\text{mV s}^{-1}$ . Then, corresponding gravimetric capacitances were evaluated based on The integral area of the CV curve.

Plotting the reciprocal of gravimetric capacitances ( $C^{-1}$ ) against the square root of scan rates ( $v^{0.5}$ ) should yield a linear correlation between them. Specifically, the correlation can be described by the following Equation S1:

$$C^{-1} = \text{constant } v^{0.5} + C_T^{-1} \quad (\text{S1})$$

Where  $C$  was experimental gravimetric capacitance,  $v$  was the scan rate and  $C_T$  was the total capacitance, respectively. The “total capacitance” equals the sum of electrical

double layer capacitance and pseudocapacitance.

Plotting the gravimetric capacitances ( $C$ ) against the reciprocal of square root of scan rates ( $\nu^{-0.5}$ ) should also give a linear correlation described by the following Equation S2 (if assuming a semi-infinite diffusion of ions):

$$C = \text{constant } \nu^{-0.5} + C_{dl} \quad (\text{S2})$$

Linear fit the plot and extrapolate the fitting line to y-axis given the maximum electrical double layer capacitance ( $C_{dl}$ ). Subtraction of  $C_{dl}$  from  $C_T$  got the maximum  $C_p$ .

### Dunn Method

The Dunn method was applied to quantitatively differentiate the capacitance contribution from surface capacitive effects (herein we regard them as electrical double layer capacitance effects) and diffusion-controlled processes (herein we regard them as pseudocapacitance reactions) capacitive effects. At a fixed potential, the current density [ $I_{(V)}$ ] read from a CV can be expressed as a combination of two terms as follow:

$$I_{(V)} = k_1\nu + k_2\nu^{0.5} \quad (\text{S3})$$

Where the term  $k_1\nu$  accounted for the current density contributed from electrical double layer capacitance effects while the term  $k_2\nu^{0.5}$  was the current density associated with pseudocapacitance reactions. Dividing  $\nu^{0.5}$  on both sides of the Equation S3 yields:

$$I_{(V)}/\nu^{0.5} = k_1\nu^{0.5} + k_2 \quad (\text{S4})$$

Therefore, Image of  $I_{(V)}/\nu^{0.5}$  vs.  $\nu^{0.5}$  was plotted by fetching the  $I_{(V)}$  from CVs obtained under a series of scan rates, where a linear fitting line was obtained with slope equals  $k_1$  and y-intercept of  $k_2$ . Plugging the obtained  $k_1$  and  $k_2$  into Equation S3 allowed one to differentiate the capacitance contribution from electrical double layer capacitance and pseudocapacitance at the specific potential  $V$  and a selected scan rate  $\nu$ . The capacitance ratio of pseudocapacitance to electrical double layer capacitance equals the ratio of the area of the purple or pink region to the area of the white region.

Repeating the aforementioned steps for other scan rates results in the pseudocapacitance and electrical double layer capacitance contributions.

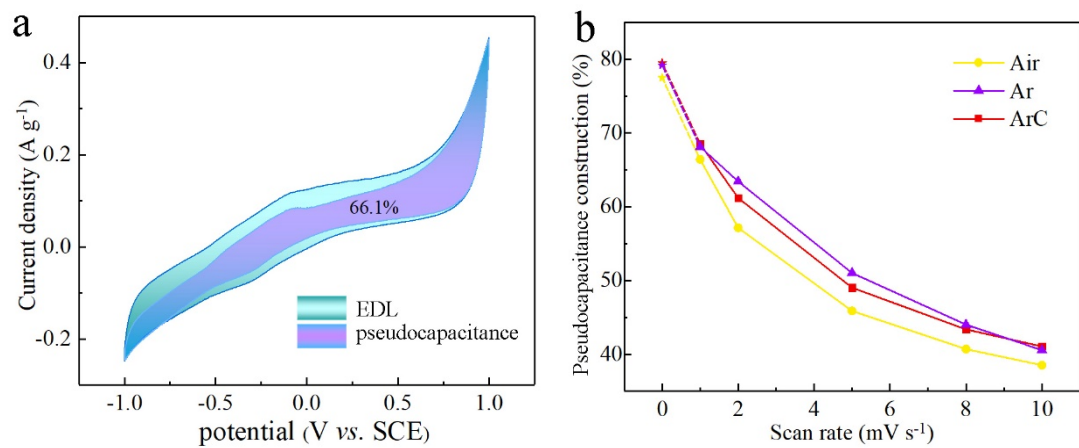

Figure S4 (a) CV curves and diffusion contributions of HTO samples at a scanning rate of  $1 \text{ mV s}^{-1}$ . (b) Diffusion contribution of three samples at different scanning rates.
